# Supplementary material for: Fate of rice shoot and root residues, rhizodeposits, and microbe-assimilated carbon in paddy soil: I. Decomposition and priming effect
Source: Copernicus journal article supplement (doi:10.5194/bg-2016-86), 2016-05-09
Supplement: Supplementary file 1 [file bg-2016-86-supplement.pdf]

1 **Supplementary Materials**

2

3 **Fate of rice shoot and root residues, rhizodeposits, and microbe-assimilated**  
4 **carbon in paddy soil: I. Decomposition and priming effect**

5

6 **Zhenke Zhu<sup>1,2,#</sup>, Guanjun Zeng<sup>2,#</sup>, Tida Ge<sup>1,2\*</sup>, Yajun Hu<sup>1</sup>, Chengli Tong<sup>1</sup>, Olga Shibistova<sup>3,4</sup>,**  
7 **Juan Wang<sup>1</sup>, Georg Guggenberger<sup>1,3</sup>, and Jinshui Wu<sup>1,2\*</sup>**

8 <sup>1</sup>Key Laboratory of Agro-ecological Processes in Subtropical Region, Institute of Subtropical  
9 Agriculture, Chinese Academy of Sciences, Hunan, 410125, China

10 <sup>2</sup>Changsha Research Station for Agricultural and Environmental Monitoring, Institute of Subtropical  
11 Agriculture, Chinese Academy of Sciences, Hunan, 410125, China

12 <sup>3</sup>Institute of Soil Science, Leibniz Universität Hannover, 30419 Hannover, Germany

13 <sup>4</sup>VN Sukachev Institute of Forest, Siberian Branch, Russian Academy of Sciences, 660036  
14 Krasnoyarsk, Russian Federation

15 #These authors contributed equally to this work.

16

17 *Correspondence to:* Tida Ge (gtd@isa.ac.cn) and Jinshui Wu (jswu@isa.ac.cn)

18

19

20 **Fig. S1.** Cumulative  $^{13}\text{C}$  emissions (% initial  $^{13}\text{C}$ ) of rice paddy soils treated with different  $^{13}\text{C}$ -labelled  
21 carbon substrates over a 300-d incubation. Values and error bars represent the means  $\pm$  SE (n = 4).  
22 Shoot-C, unlabelled paddy soil containing  $^{13}\text{C}$ -labelled shoot residue; Root-C, unlabelled paddy soil  
23 containing  $^{13}\text{C}$ -labelled root residue; Rhizo-C, paddy soil containing  $^{13}\text{C}$ -labelled rice rhizodeposits;  
24 Micro-C, paddy soil containing  $^{13}\text{C}$ -labelled microbial-assimilated C.

25

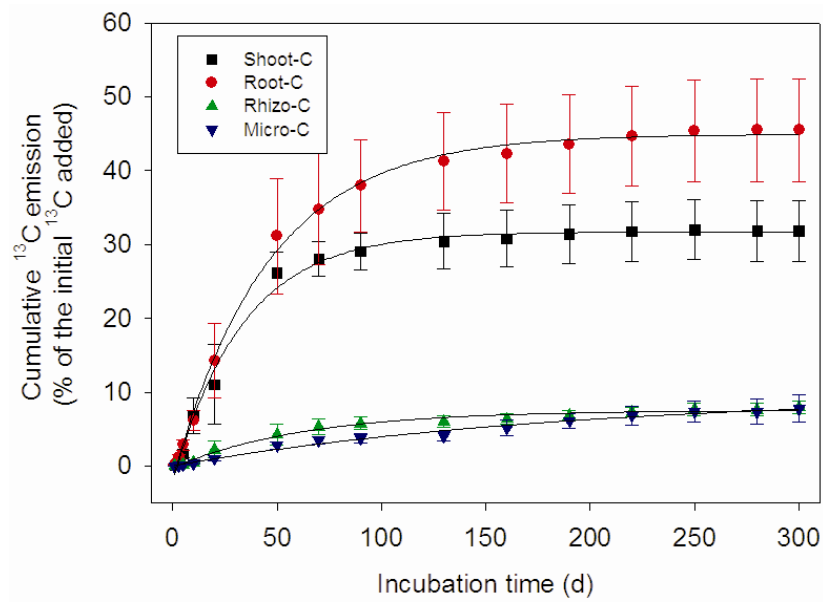

26
